# Supplementary material
Source: PubMed Central journal article supplement (PMC8075272)
Supplement: NIHMS1065888-supplement-Supplemental.pdf [file NIHMS1065888-supplement-Supplemental.pdf]

## Supporting Information

# Thermosensitive Biodegradable Copper Sulfide Nanoparticles for Real-Time Multispectral Optoacoustic Tomography

*Sixiang Shi,<sup>1</sup> Xiaofei Wen,<sup>1,2,3</sup> Tingting Li,<sup>1,4</sup> Xiaoxia Wen,<sup>1</sup> Qizhen Cao,<sup>1</sup> Xinli Liu,<sup>5</sup> Yiyao Liu,<sup>1,4</sup>*

*Mark D. Pagel,<sup>1</sup> and Chun Li<sup>1,\*</sup>*

<sup>1</sup> Department of Cancer Systems Imaging, The University of Texas MD Anderson Cancer Center, Houston, TX 77054, USA

<sup>2</sup> Molecular Imaging Research Center, The Fourth Hospital of Harbin Medical University, Harbin, Heilongjiang 150001, China

<sup>3</sup> Heilongjiang Key Laboratory of Scientific Research in Urology, The Fourth Hospital of Harbin Medical University, Harbin, Heilongjiang 150001, China

<sup>4</sup> Department of Biophysics, University of Electronic Science and Technology of China, Chengdu, Sichuan 610054, China

<sup>5</sup> Department of Pharmacological & Pharmaceutical Sciences, University of Houston, Houston, TX 77204, USA

**Corresponding Author: \* Chun Li, PhD**

Cancer Systems Imaging, The University of Texas MD Anderson Cancer Center, Room  
3SCR4.3636, 1881 East Road Unit 1907, Houston, TX 77054, USA.

E-mail: [cli@mdanderson.org](mailto:cli@mdanderson.org); Phone: 713-792-5182; Fax: 713-794-5456.

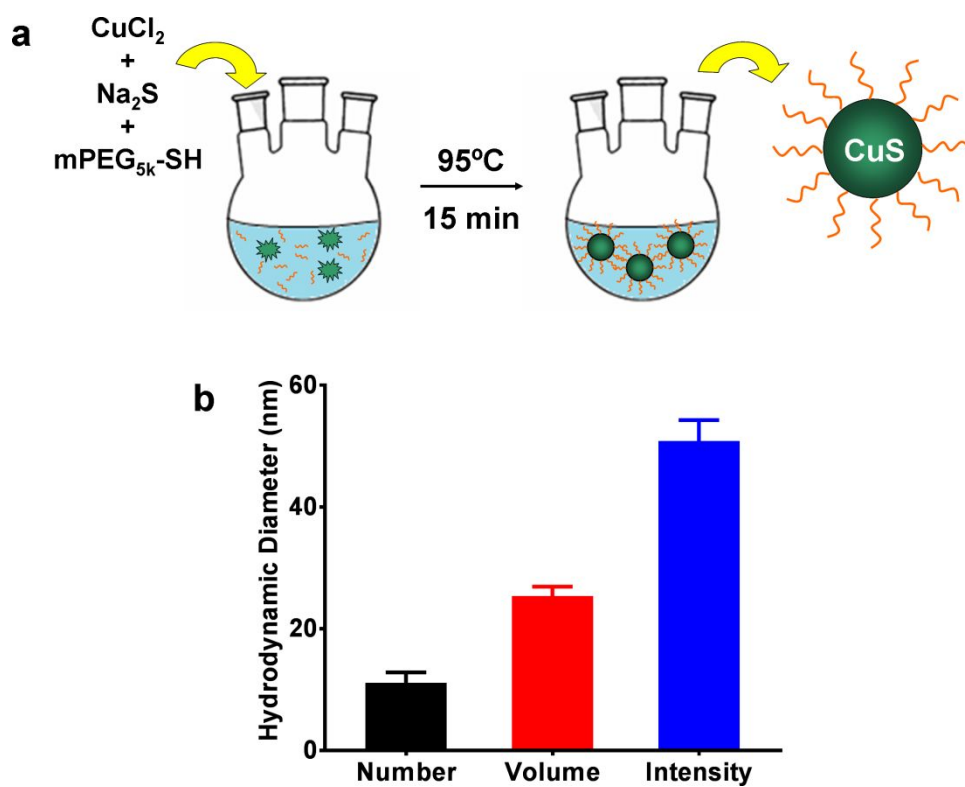

**Figure S1.** Synthesis and characterization of CuS-PEG nanoparticles. **(a)** Schematic illustration of the one-step synthesis of CuS-PEG nanoparticles. **(b)** Average hydrodynamic diameters of CuS-PEG nanoparticles with number, volume, and intensity size distribution.

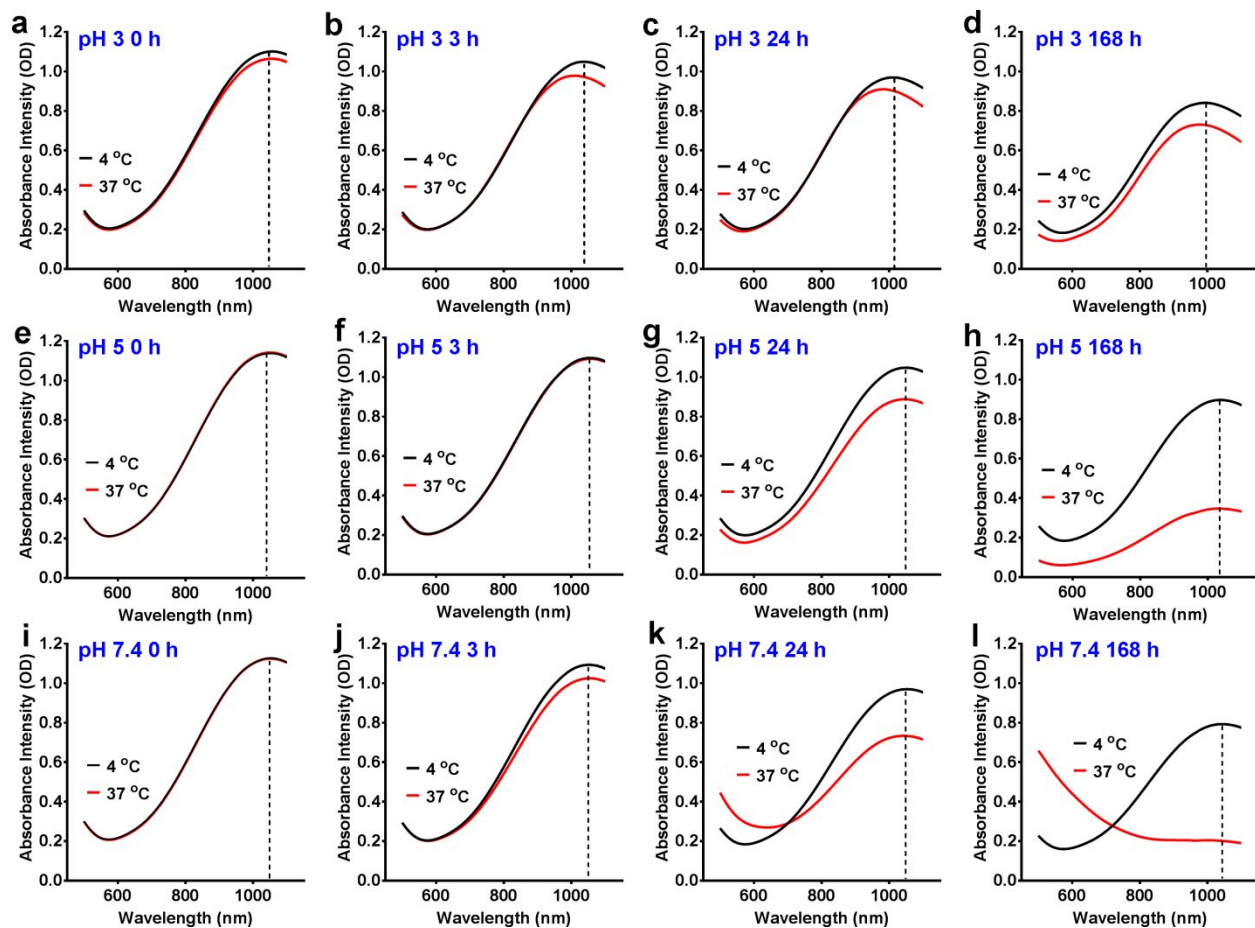

**Figure S2.** (a-l) Comparison of absorbance profiles of CuS-PEG nanoparticles incubated at 4 °C and 37 °C under different conditions.

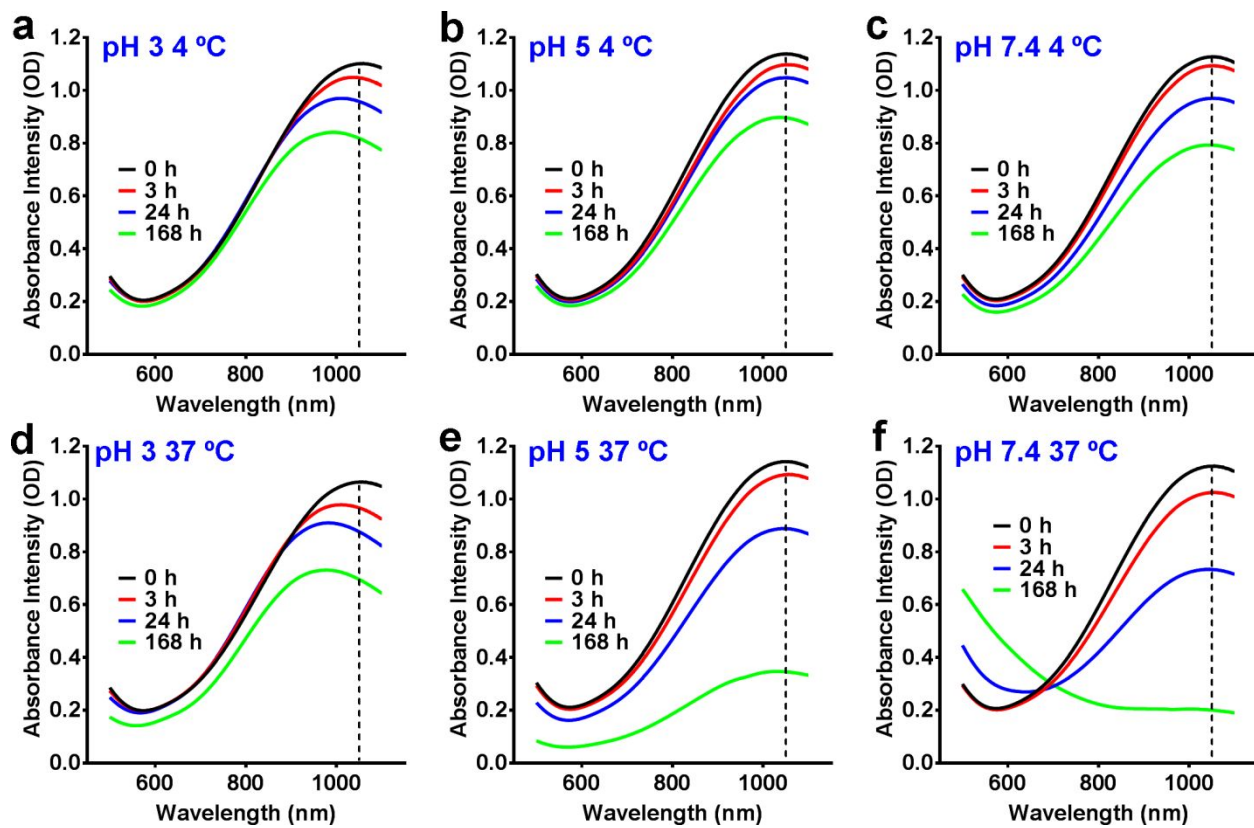

**Figure S3.** (a-f) Comparison of absorbance profiles of CuS-PEG nanoparticles incubated for 0, 3, 24, and 168 h under different conditions.

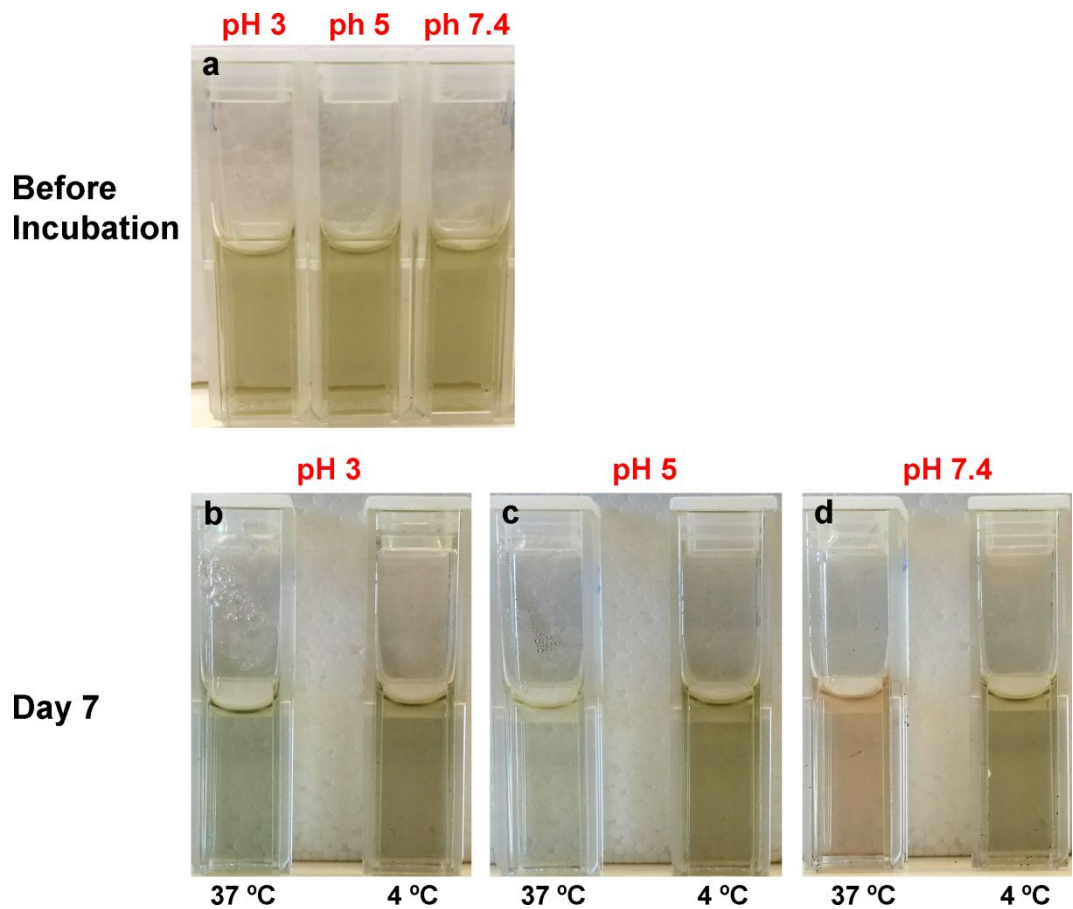

**Figure S4.** The photographs of CuS-PEG nanoparticles before incubation (a) or after 7 days incubation at different conditions (b-d).

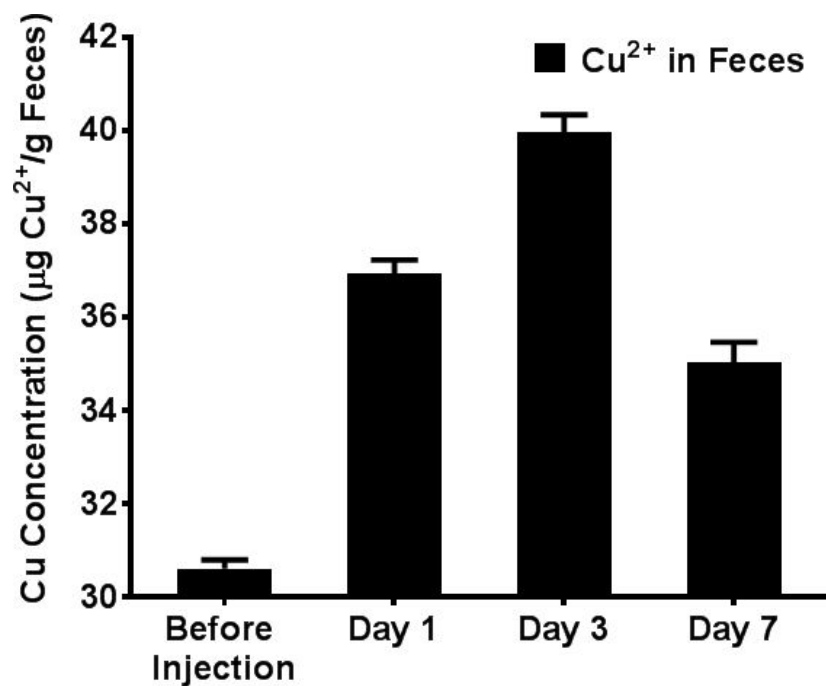

**Figure S5.** ICP-OES analysis of Cu elemental concentration in mouse feces collected at different time points after i.v. injection of CuS-PEG nanoparticles (n = 3).

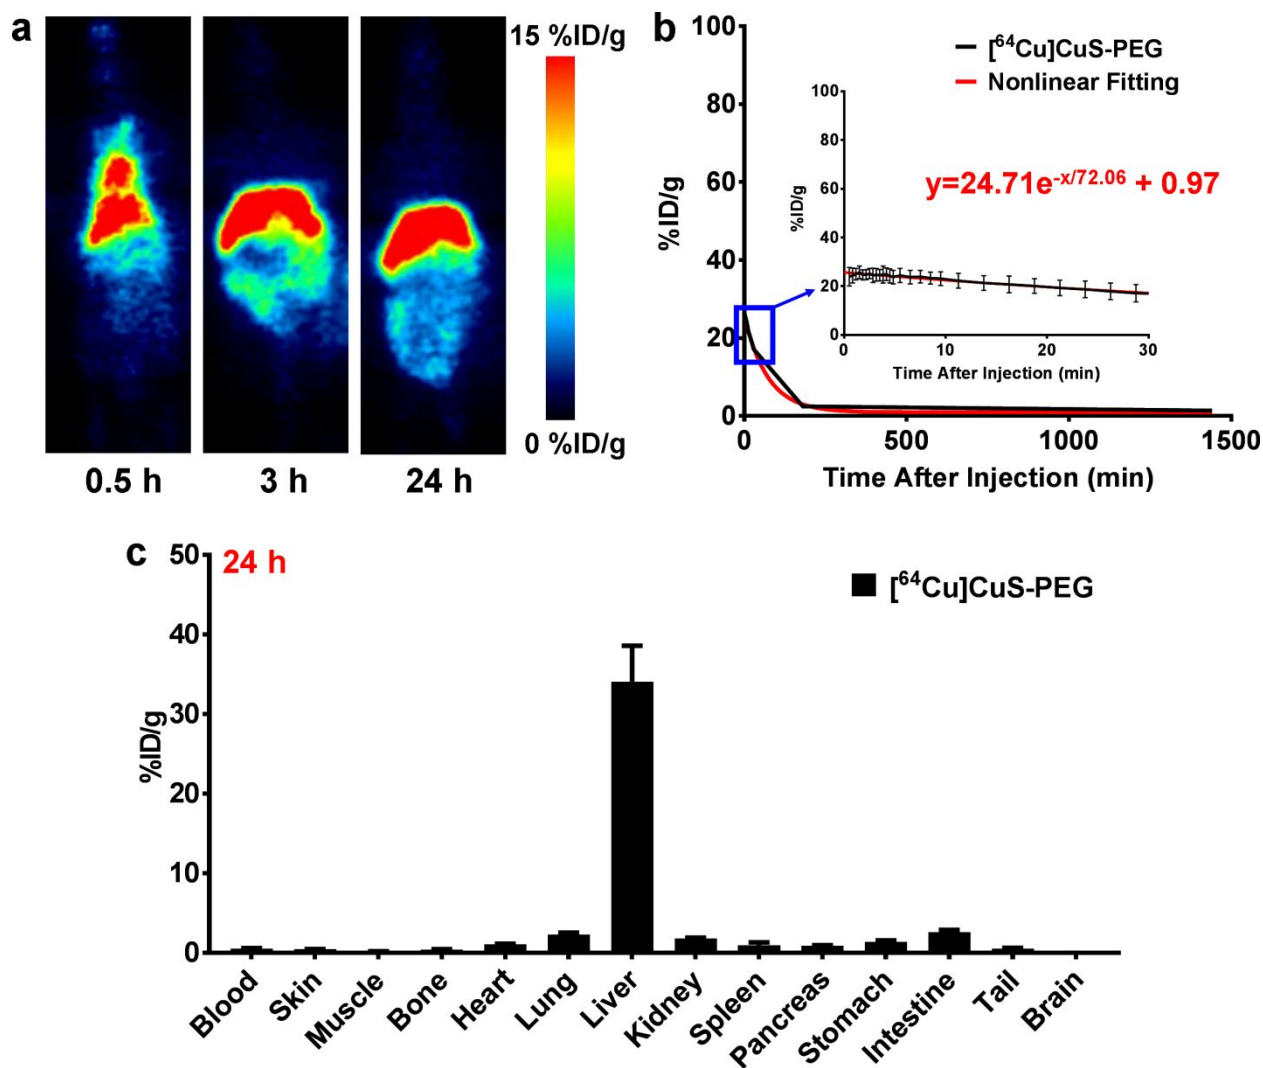

**Figure S6.** Serial *in vivo* PET images (a), region of interest (ROI) analysis of the blood uptake with nonlinear fitting (b) and *ex vivo* biodistribution studies (c) after i.v. injection of intrinsically radiolabeled CuS-PEG nanoparticles ( $[^{64}\text{Cu}]\text{CuS-PEG}$ ) (n = 4). Dynamic scans were performed for the first 30 min immediately after injection of  $[^{64}\text{Cu}]\text{CuS-PEG}$ . Static scans were performed at 3 h and 24 h p.i.. The blood uptake was measured by ROI analysis of heart on PET images.



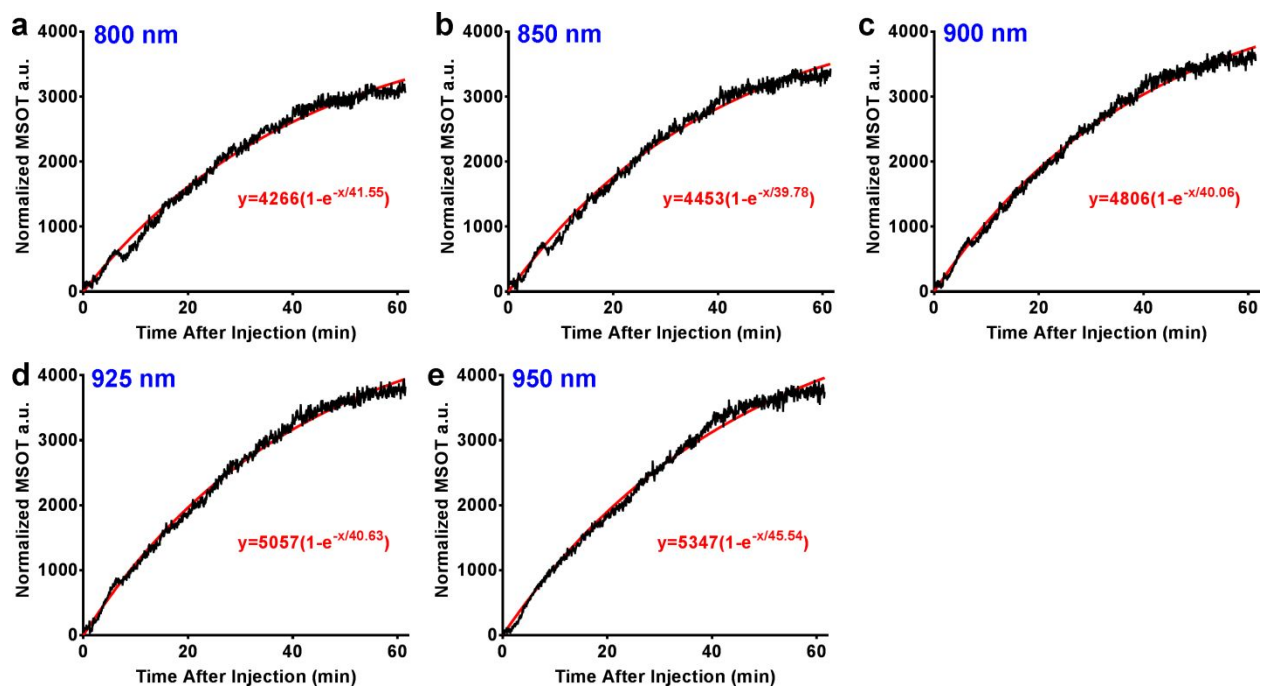

**Figure S7.** In situ tumor MSOT intensity profiles with nonlinear fitting using the equation of one-phase exponential association  $y = y_{\max} \cdot (1 - e^{-x/\tau})$ , where  $y$  represents normalized MSOT absorbance intensity (a.u.) and  $x$  represents the time after injection (min), at 800 nm (a), 850 nm (b), 900 nm (c), 920 nm (d), and 950 nm (e).
